1  
2  
3  
4  
5  
6  
7  
8  
9  
10  
11  
12  
13  
14  
15  
16  
17  
18  
19  
20  
21

# U-Net as a deep learning-based method for platelets segmentation in microscopic images

## (Deep Learning-Based Platelets Images Segmentation)

Ajay Kumar<sup>1</sup>, Charlie A. Coupland<sup>2</sup>, Tania F. Vaz<sup>3,4</sup>, Will Jones<sup>1</sup>, Rubén Valcarce-Diñeiro<sup>1</sup>,  
Simon D. J. Calaminus<sup>2</sup>, Eva Sousa<sup>1,2\*</sup>

<sup>1</sup> Centre of Excellence for Data Science, Artificial Intelligence and Modelling, University of Hull, Hull, United Kingdom

<sup>2</sup> Centre for Biomedicine, Hull York Medical School, University of Hull, Hull, United Kingdom

<sup>3</sup> Instituto de Biofísica e Engenharia Biomédica, Faculdade de Ciências da Universidade de Lisboa, Lisbon, Portugal

<sup>4</sup> Departamento de Engenharia Química, Instituto Superior de Engenharia de Lisboa, Instituto Politécnico de Lisboa, Lisbon, Portugal

\* Corresponding author:

E-mail: [e.sousa@hull.ac.uk](mailto:e.sousa@hull.ac.uk) (ES)

## 22 **Abstract**

23

24 Manual counting of platelets, in microscopy images, is greatly time-consuming. Our  
25 goal was to automatically segment and count platelets images using a deep learning approach,  
26 applying U-Net and Fully Convolutional Network (FCN) modelling. Data preprocessing was  
27 done by creating binary masks and utilizing supervised learning with ground-truth labels. Data  
28 augmentation was implemented, for improved model robustness and detection. The number of  
29 detected regions was then retrieved as a count. The study investigated the U-Net models  
30 performance with different datasets, indicating notable improvements in segmentation metrics  
31 as the dataset size increased, while FCN performance was only evaluated with the smaller  
32 dataset and abandoned due to poor results. U-Net surpassed FCN in both detection and counting  
33 measures in the smaller dataset Dice 0.90, accuracy of 0.96 (U-Net) vs Dice 0.60 and 0.81  
34 (FCN). When tested in a bigger dataset U-Net produced even better values (Dice 0.99, accuracy  
35 of 0.98). The U-Net model proves to be particularly effective as the dataset size increases,  
36 showcasing its versatility and accuracy in handling varying cell sizes and appearances. These  
37 data show potential areas for further improvement and the promising application of deep  
38 learning in automating cell segmentation for diverse life science research applications.

39

## 40 **Author Summary**

41 Deep Learning can be used with good results for automatic cells images segmentations,  
42 reducing the time applied by scientists to this task. In our research platelets images were  
43 automatically segmented and counted using by applying U-Net and Fully Convolutional  
44 Network (FCN) modelling. Data preprocessing was done by creating binary masks and  
45 utilizing supervised learning with ground-truth labels, after data augmentation. U-Net  
46 surpassed FCN in both detection and counting measures in a smaller dataset. The U-Net model

47 proves to be particularly effective as the dataset size increases, showcasing its versatility and  
48 accuracy in handling varying cell sizes and appearances. Our study shows potential areas for  
49 further improvement and the promising application of deep learning in automating cell  
50 segmentation for diverse life science research applications.

51

52

## 53 **Introduction**

54

55 In recent years, cell segmentation has emerged as a critical component in numerous  
56 research fields, including bioinformatics, cell biology, and computational biology [1–3]. Deep  
57 convolutional neural networks (CNNs) have revolutionized visual recognition tasks,  
58 outperforming traditional methods across various domains [4]. By utilizing CNNs, deep  
59 learning algorithms have demonstrated the ability to accurately identify and count cells in  
60 biomedical images [5]. However, the conventional use of CNNs in classification tasks does not  
61 fully address the complexities of cell segmentation in microscopy images, where pixel-level  
62 localization is crucial [6].

63 Cell segmentation, the process of delineating cell boundaries in microscopy images, is  
64 a critical step for morphological analysis and downstream quantification of biological  
65 structures. Since 2015, a range of deep CNN architectures have achieved breakthrough results  
66 on standard cell segmentation benchmarks [7]. Early networks like U-Net by Ronneberger et  
67 al. [8] introduced a symmetric encoder-decoder structure to propagate multi-scale contextual  
68 information, which became highly influential. Other top designs utilized pre-trained  
69 classification backbones like Visual Geometry Group by Simonyan and Zisserman [9] or  
70 Residual Networks by He et al. [10], to effectively initialize deep models. More recent  
71 techniques further incorporated elements like atrous convolutions by Chen et al. [11] and

72 generative adversarial training [12] to capture both local details and global consistency.  
73 Powered by ever larger annotated datasets, these latest CNNs have surpassed human experts  
74 on nuclei segmentation and approaching expert inter-observer agreement on challenging cell  
75 contouring tasks [13,14].

76 However, substantial obstacles prevent the real-world adoption of deep learning  
77 segmentation tools. Cell images exhibit high appearance variability under different  
78 experimental conditions, with artifacts like missing cellular boundaries, that easily confuse the  
79 models [15]. Complexities such as cell-cell interactions, for example overlapping cells or cell-  
80 background interactions, also pose difficulties [16]. Such data heterogeneity issues combined  
81 with label noise and inconsistencies during manual segmentation, poses several segmentation  
82 challenges [17,18]. Furthermore, while state-of-the-art results are reported on some curated test  
83 images, deep networks frequently fail to generalize across different imaging setups without  
84 extensive retraining [19].

85 To overcome these limitations, recent works have proposed techniques to improve  
86 model robustness. Generative and reconstructive approaches to incorporate unlabelled data  
87 during training can enhance generalizability [20]. Assessment of remaining errors to guide  
88 annotation and data augmentation can mitigate dataset bias [21]. Through focused  
89 incorporation of these sophisticated regularization, adaptation, and interaction techniques, deep  
90 CNNs may eventually fulfil their promise for practical automated cell segmentation [22,23].

91 Nowadays, both U-Net, as a particular type of FCN and FCN in general are known as  
92 CNN architectures to be employed in microscopy and biomedical image analysis, with U-Net  
93 being a particular type of FCN [24,25]. While FCN utilizes a classification network like  
94 ImageNet by Krizhevsky et al. [26], and U-Net was built on fully convolutional network (FCN)  
95 with hourglass topology [8,24]. Semantic segmentation framework is based on a bounding box-  
96 based segmentation pipeline that extracts the foreground from a given region of interest. It

97 focused on image local patterns and extracted complex image information at various scales. It  
98 has proven to be successful in biomedical applications and has gained popularity in many  
99 research studies in cell detection [5,27] and cell segmentation [28,29].

100 The recent growing of deep learning applications for microscopic analysis is  
101 revolutionizing the process of classifying, counting and segmenting cells [30]. These tasks  
102 which traditionally were performed by humans and are very time consuming, have a high  
103 potential of success to be fully automated through deep learning algorithms with good results  
104 [31]. Furthermore, manual segmentation also introduces a high degree of user subjectivity and  
105 variability which may have an impact on the experimental results obtained [31].

106 Therefore, this research aims to build an automated system for platelets segmentation  
107 and respective size determination, on microscopy images, by creating a mask that allows the  
108 platelets detection and counting.

109

## 110 **Results**

### 111 **Model evaluation**

112

113 Experiments with the smaller dataset (293 images) were performed both with FCN  
114 and with U-Net, while only the two bigger datasets (1172 and 4688 images) were used with U-  
115 Net. Experiments with FCN were abandoned after experiments with the smallest data set due  
116 to its inferior comparative performance. Different methodologies of threshold were used for  
117 the two types of networks. FCN used a method of segmentation by the Sobel operator, while  
118 U-Net used binarization of the image to create ground-truth masks for segmentation.

119

### 120 **FCN model evaluation**

121

122 Data pre-processing within the FCN model generated masks as segmented images from  
123 Sobel operator at a kernel or threshold value of 7, as shown in Fig 1. As it can be seen the Sobel  
124 operator tends to enhance the edges of the platelets [32].

125  
126  
127  
128

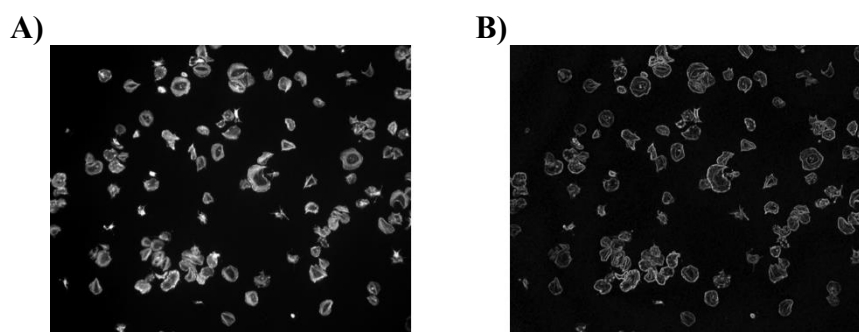

129

130 **Fig 1. Identification of Sobel Segmented Images within FCN model.** Platelets ( $2 \times 10^7/\text{ml}$ )  
131 were spread on fibrinogen for up to 45 minutes, before fixation, staining, and imaging using a  
132 Zeiss Axiovert Fluorescent microscope (oil x63 NA 1.4 objective). (A) Image is representative  
133 of control conditions. (B) Representative image segmented by enhanced Sobel operator.

134

135 The FCN model was evaluated with the complete iteration of 10 epochs utilizing a  
136 processing time of 1206 seconds and resulted in an accuracy of 0.81, reaching an Area Under  
137 the Curve (AUC) of the Receiver Operating Characteristic (ROC) of 0.71. This and the loss  
138 function can be seen in Fig 2. For visually inspecting the cell segmentation and the model's  
139 performance, the ground truth masks were compared with the masks predicted by the model.  
140 But the model failed to demonstrate or produce predicted cell counts as it resulted in MPE of  
141 55.44%.

142

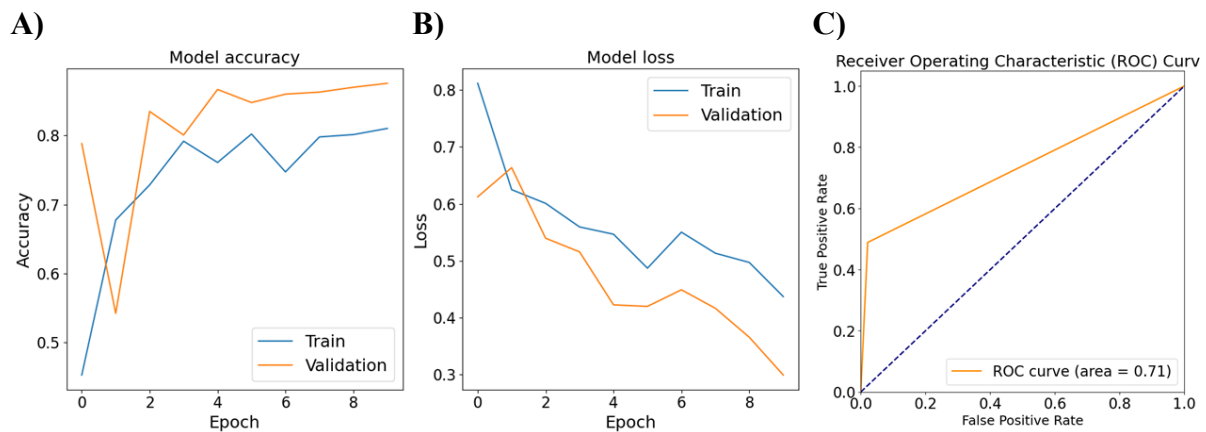

143

144 **Fig 2. Plots of FCN model evaluated on 293 images. (A) training and validation loss; (B)**

145 **accuracy; and (C) AUC-ROC.**

146

### 147 **U-Net model evaluation**

148

149 In the U-Net model instead of the Sobel operator, binary masks of the platelets images,  
150 named ground-truth masks were created preprocessing using a threshold of 25 for image  
151 binarization. An example of the ground truth mask, and of the image from which were created  
152 are shown in Fig 3.

153

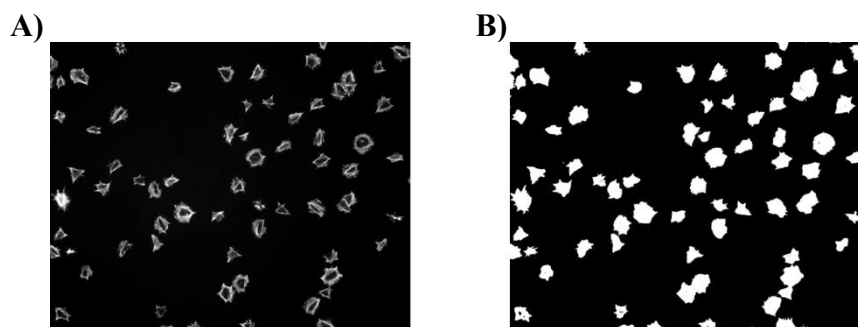

154

155 **Fig 3. Identification of ground truth marks within U-Net model. Platelets (2x10<sup>7</sup>/ml) were**

156 **spread on fibrinogen for upto 45 minutes, before fixation, staining and imaging using a Zeiss**

157 Axiovert Fluorescent microscope (oil x63 NA 1.4 objective). (A) Image is representative of  
158 control conditions. (B) Representative image with the corresponding ground-truth masks.

159

160 The U-net model was pre-trained with generated masks and a complete iteration of 10  
161 epochs was monitored on both the training and validation datasets resulting in an accuracy of  
162 0.96. A lower MAE of 2.6% suggests that model's predictions are close to the true values,  
163 reflecting accuracy in pixel-wise predictions, as shown in Fig 4.

164

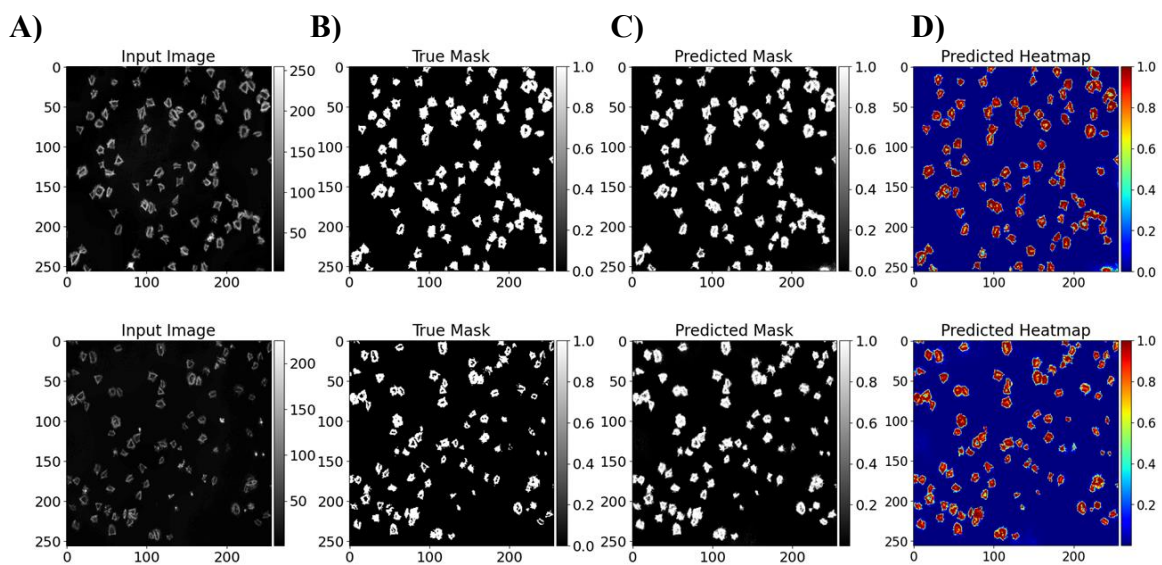

165

166 **Fig 4. Identification of platelet segmentation with U-Net model.** Platelets ( $2 \times 10^7/\text{ml}$ ) were  
167 spread on fibrinogen for up to 45 minutes, before fixation, staining and imaging using a Zeiss  
168 Axiovert Fluorescent microscope (oil x63 NA 1.4 objective). (A) Image is representative of  
169 control conditions; (B) representative image with ground-truth masks; (C) predicted images  
170 from U-Net model; (D) corresponding heat maps. All images have a dimension of  $256 \times 256$   
171 pixels.

172

173 Lastly, the U-Net model was evaluated by rotating 1172 images into specified degrees  
174 of 90, 180, and 270, creating a combined dataset of 4688, and their corresponding masks were



175 generated at threshold of 25. The training accuracy reached 0.98 and the validation loss  
176 continued to improve across epochs reaching an AUC of the ROC of 0.99, as shown in Fig 5.

177

178

179

180

181

182

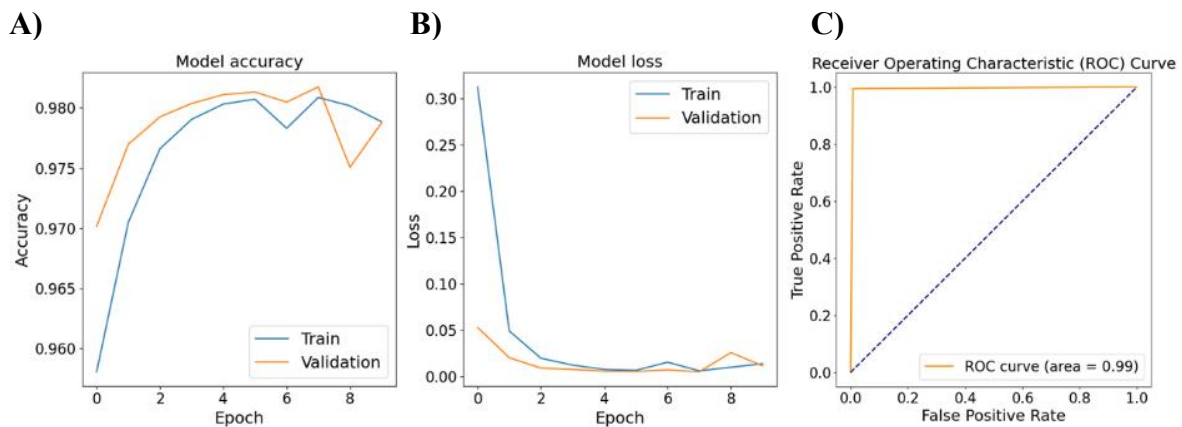

183

184 **Fig 5. Plots of the U-Net model evaluated on 4688 images. (A) training and validation**  
185 **accuracy, (B) loss and (C) AUC-ROC.**

186

## 187 **Cell counting by U-Net**

188

189 Following the training of the U-Net, the subsequent phase involved cell count drawn  
190 from a dataset encompassing 4688 images. The training employed a L2 loss function,  
191 incorporating aleatoric uncertainty for cell counts (Fig 6), and optimization was carried out  
192 using the Adam optimizer with a learning rate of  $1E-4$  and a batch size of 8 (Fig 8). The  
193 estimation of cell sizes in the predicted masks, as shown in Fig 7, for each segmented cell

194 (region) was calculated in terms of number of pixels it occupies at region (bounding box size)  
195 with a threshold of 50.

196

197

198

199

200

201

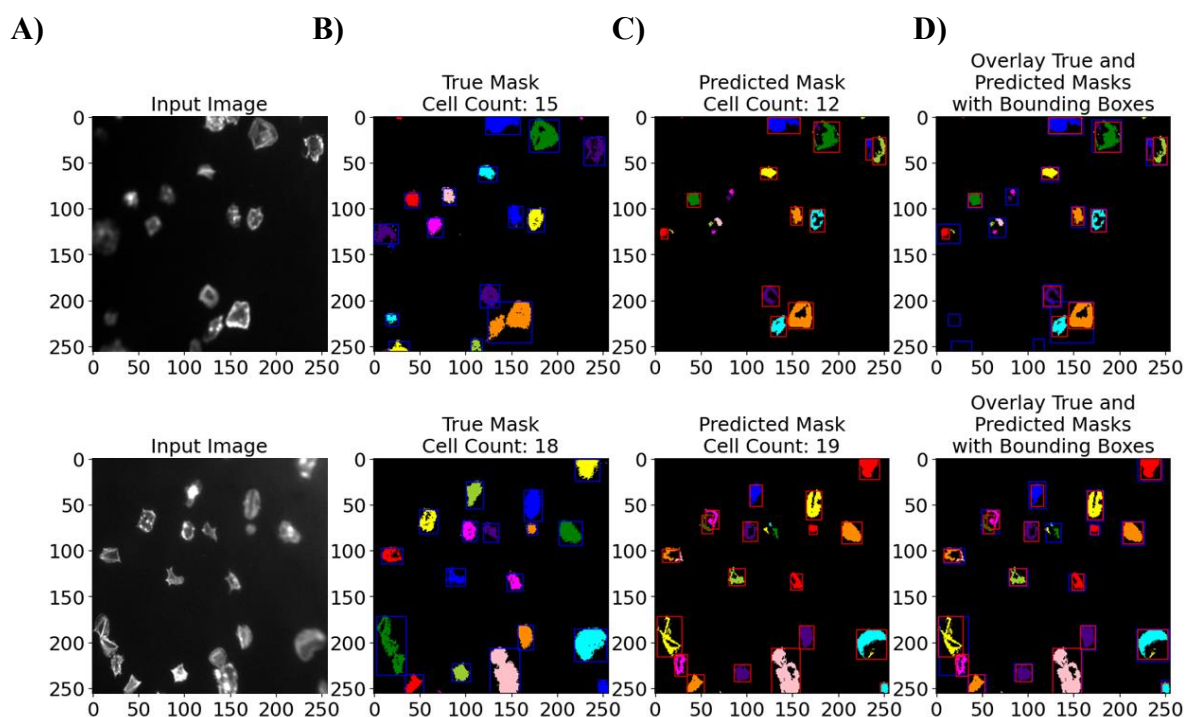

202

203 **Fig 6. Two examples of Sample of segmentation results of images from U-Net model cell**

204 **counts of true and predicted masks. (A) Original input images, (B) ground truth masks, (C)**

205 **predicted masks, and (D) corresponding overlay. All images have a dimension of 256x256**

206 **pixels.**

207

208

209

210  
211  
212  
213  
214  
215  
216  
217

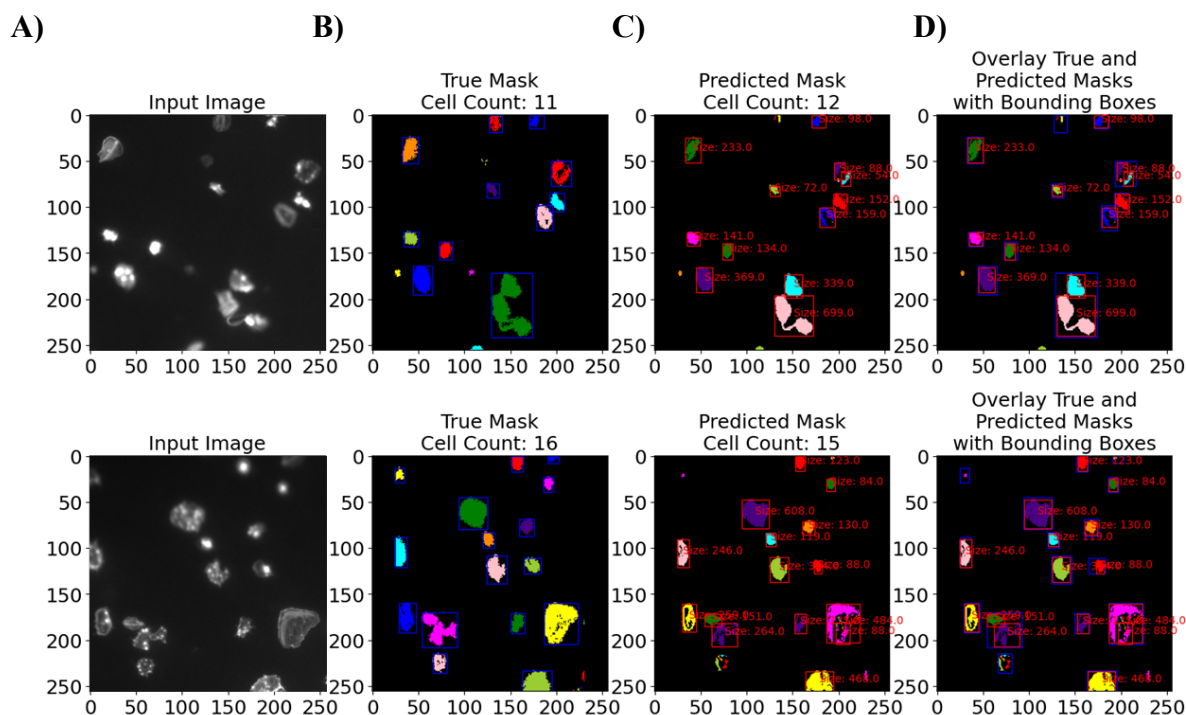

218  
219  
220  
221  
222  
223  
224

**Fig 7. Two examples of Sample of segmentation results of images from U-Net model with cell size in number of pixels. (A) Original input images, (B) ground truth masks, (C) predicted masks, and (D) corresponding overlay. All images have a dimension of 256x256 pixels.**

## **Cell segmentation and quantitative evaluation by U-Net**

225 The outcomes derived from the evaluation of U-Net models on the three dataset groups  
226 indicated a very positive correlation between the size of the dataset and the positive results,  
227 achieving higher values for the bigger dataset, as it can be seen in Table 1. In the biggest dataset  
228 the maximum values are accuracy of 0.98, recall 0.98, precision of 0.99, IoU of 0.99 and Dice  
229 of 0.99. Additionally, a concurrent reduction in both dice loss and sparse categorical cross-  
230 entropy loss was observed, as the employed loss functions exhibited a robust interdependence  
231 and displayed an inverse relationship with accuracy (Figs 5A and 5B). Following the specified  
232 criteria, the most favourable U-Net configuration [33] involved five encoding and decoding  
233 blocks. This assessment also extended to the examination of the number of filters in the initial  
234 encoding block, revealing a doubling of filters with each subsequent block and a corresponding  
235 halving with each decoding block. The optimum number of filters, within the investigated  
236 parameters, was identified as 64 in the first encoding block. This U-Net has been used for other  
237 types of segmentation tasks [33] but was revealed more successful in the application to platelets  
238 segmentation than another U-Net model initially tested, and which is more commonly used in  
239 cell segmentation [8].

240 Table 1 elucidates the performance outcomes, throughout several metrics, of cell  
241 segmentation derived from the evaluation of the test set for each model. The evaluation was  
242 conducted across distinct datasets characterized by varying numbers of images, with the U-Net  
243 model serving as the segmentation architecture.

244

245 **Table 1.** Cell segmentation performance results computed for each model.

| <b>Model</b> | <b>Dataset (number of images)</b> | <b>Dice</b> | <b>IoU</b> | <b>Precision</b> | <b>Recall</b> | <b>Accuracy</b> | <b>Training Time (s)</b> |
|--------------|-----------------------------------|-------------|------------|------------------|---------------|-----------------|--------------------------|
| <b>U-Net</b> | 293                               | 0.90        | 0.82       | 0.85             | 0.95          | 0.96            | 1766                     |
|              | 1172                              | 0.98        | 0.97       | 0.99             | 0.97          | 0.97            | 6417                     |
|              | 4688                              | 0.99*       | 0.99*      | 0.99*            | 0.99*         | 0.98*           | 6354                     |
| <b>FCN</b>   | 293                               | 0.60        | 0.42       | 0.92             | 0.44          | 0.81            | 1206                     |

246 \* Best scores

247

248         Across the dataset comprising 293 images, the U-Net model achieved a Dice coefficient  
249 of 0.90, indicating a substantial agreement between the predicted and ground-truth  
250 segmentation masks. The IoU, measuring the overlap between the predicted and true  
251 segmentations, was 0.82. The precision, reflecting the positive predictive value, was observed  
252 to be 0.85, while recall, gauging the model's ability to capture all positive instances, exhibited  
253 a value of 0.95. The overall accuracy, encompassing both true positive and true negative  
254 predictions, was 0.96. It is worth noting that using the optimum threshold of 0.25 assures huge  
255 cut-offs and enforces only detections with high confidence, as this was the only value in which  
256 all the platelets were correctly included in the binarization of the im-aging. A too low threshold  
257 would increase the areas beyond the platelets area, while a too high one would confuse darker  
258 platelets as background. Although desirable, this behaviour increases false negatives, as fewer  
259 platelets are spotted resulting in accuracy down-fall, with the impact of false negatives being  
260 twice as large as it is in Dice of 0.90, explaining the disparity between these two metrics. The  
261 single significant exception is accuracy, which U-Net architectures excels at. This is most likely  
262 owing to an "over-detection" tendency. Nonetheless, the FCN counterparts outperform this  
263 tendency by significantly im-proving accuracy and precision reported at 0.81 and 0.92,  
264 respectively.

265         As the dataset size increases to 1172 and 4688 images, the U-Net model demonstrated  
266 notable improvements in performance metrics. The Dice coefficient increased to 0.98 and 0.99  
267 respectively, indicating enhanced segmentation agreement, while IoU rises to 0.97 and 0.99,  
268 depicting increased overlap between predicted and true segmentation. The consistently high  
269 values across various evaluation metrics sustained the U-Net model's effectiveness in handling  
270 datasets with varying cell sizes and appearances, as reported in Table 1. The model exhibited

271 further refinement in segmentation due to a series of deconvolutional layers that reconstructed  
272 the output image from the extracted features as the training data increased. In contrast, FCN  
273 models do not have analogous shortcut paths to retain and fuse low-level information through  
274 the network architecture. IoU of 0.42 proves that as sequential encoder-decoder flows, FCN  
275 faces more challenges restoring spatial de-tails from compressed latent bottles when built on  
276 smaller datasets, as it was seen from the results of the comparison of both models in the 293  
277 images set where both were tested. For this smaller dataset, U-Net model's MAP of 0.99  
278 denoted exceptional precision across the dataset, suggesting a minimal number of false  
279 positives and high relevance in the predicted outcomes. MAE of 0.002 and MPE of -0.050  
280 indicated a close alignment between the model's prediction with a negative sign showing a  
281 slight underestimation on average. For the FCN Model, the results suggest that it performs  
282 reasonably well in terms of precision, with MAP scores around 0.8365. However, there is room  
283 for improvement in reducing the absolute and percentage errors in pixel-wise predictions, as  
284 indicated by the MAE and MPE values of 0.1828 and 0.5544 respectively.

285

## 286 **Discussion**

287

288 Deep Learning use for imaging classification, segmentation and counting has some  
289 advantages over this work being done by humans. First convolutional neural networks are more  
290 consistent than humans, as they will (1) classify images identically each time, (2) do not  
291 introduce differences in the procedure (3), are a great time saver [33]. Given all the  
292 improvement possibilities for imaging classification, segmentation and counting, it is of crucial  
293 importance to find suitable methods to support or replace humans in these tasks where it is  
294 possible [34,35].

295 From our research we are led to believe that the U-Net model could be very promising  
296 to aide in effective analysis of platelets microscopic images. This U-Net [33] model uses the  
297 notion of deconvolution by [4,33] analysis and synthesis. The analytical path follows CNNs  
298 structure as shown in Fig 8 and the expansion step of the synthesis path consisted of an up-  
299 sampling layer followed by a deconvolution layer. It is found that the most essential aspect of  
300 U-Net is the ability to create shortcut connections between layers of equal resolution in the  
301 analysis path and the expansion path. These connections supply the deconvolution layers with  
302 critical high-resolution features [36,37].

303 The studies undertaken in this research stand on the implementation of two specific  
304 design choices which were found to significantly enhance the performance of the model.  
305 Firstly, the incorporation of ground truth masks, and second the application of a U-Net model.  
306 The incorporation of ground truth masks penalizes errors occurring on cell boundaries and in  
307 densely populated regions, proving to be instrumental in promoting precise segmentation,  
308 particularly in scenarios involving closely situated objects [38,39]. Similarly to what was  
309 reported in the bibliography [40,41] in our comparative analysis the U-Net model stands out as  
310 the most effective network outperforming the FCN (Table 1) across all performance metrics  
311 apart from the precision and training time, when both U-Net and FCN were applied to the  
312 smallest dataset. Given this difference in performance, only U-Net was applied to the bigger  
313 datasets with excellent results, in all metrics, and without much computational time added. It  
314 is important to note that as the dataset in-creased four-fold in complexity the processing times  
315 of the U-Net model remained similar (at 6417 and 6354 sec respectively). This a very  
316 advantageous characteristic when searching for a model to train [42].

317 This success seems to be due to the combination of (1) ground truth masks and (2) U-  
318 Net architecture which demonstrated high accuracy in cell count predictions and adheres to the  
319 conservative counting requirement that underscores that precise cell counts are a result of

320 accurate object detection rather than a mere balancing effect between false positives and false  
321 negatives [43].

322 In our work instead of applying a standard U-Net five-layer convolutional module  
323 already in use for cell segmentation [8], a four-layer module was used to meet the segmentation  
324 task and avoid excessive parameters [33].

325 Here an encoder with a succession of convolution and max pooling layers characterized  
326 the network, with a mirrored sequence of transposed convolutions in the decoding layer. The  
327 U-Net model learns the crucial features of the images after encoding, and to segment the image  
328 needs to decode them. Each convolutional block in the decoder has the same settings as those  
329 in the encoder. After each convolutional block, the image is up-sampled twice using bilinear  
330 interpolation to make it larger. Then, a skip connection links it to the corresponding feature  
331 map in the encoder. It utilizes a 1x1 convolutional layer after last set of decoder blocks to  
332 construct the final segmented image and for the conversion of RGB to grayscale.

333 The layer of convolution network in the FCN model is a three-dimensional data array,  
334 with each layer representing an image with height x width x depth pixels and colour channels  
335 [24]. The image is the initial layer, with receptive fields representing the image's positions.  
336 Convolution, pooling, and activation functions operate on local input regions and are based on  
337 translation invariance. The inclusion of bounding boxes around regions facilitated the  
338 quantitative assessment of segmentation accuracy (Fig 6).

339 Additionally, when considering uncertainty predictions, over 80% of ground-truth  
340 counts were found to fall within the model's predicted 95% confidence interval across our 750-  
341 image test (examples showed in Fig 6). This visualization is invaluable for understanding the  
342 segmentation performance, assessing the accuracy of cell delineation, and providing insights  
343 into potential areas for improvement. The inclusion of cell sizes and not only of the cells



344 counting, enhances the interpretability of the segmentation results by providing quantitative  
345 information about the segmented platelets within the predicted masks (Fig 7).

346 The absence of foreground masks for out-of-focus images in the dataset hinders  
347 counting performance, suggesting the potential for enhancement through the inclusion of such  
348 masks. However, challenges may persist [16,44,45], particularly in cases of overlapping cells  
349 (platelets) [46,47], a difficulty even confounding human experts. To address this, a plausible  
350 strategy involves incorporating the original image as supplementary input to the counting  
351 network. Additionally, another approach could entail utilizing randomly cropped image patches  
352 and robustly estimating counts by averaging density across multiple patches, akin to the  
353 methodology proposed by Oñoro-Rubio and López-Sastre [48].

354 Notably, similarly to other works the strategic enhancements we introduced in  
355 comparison to the original U-Net architecture, specifically the integration of a learned  
356 transformation and the inclusion of a residual block with  $3 \times 3$  filters, seem to significantly  
357 contribute to the model's superior performance [49,50]. Lastly, it becomes evident that even  
358 instances of misidentification possess a certain degree of subjectivity, residing within the  
359 nuanced boundaries of interpretability for borderline cases (examples showed in Fig 6).

360 Finally, it was shown how aleatoric losses can be used to estimate uncertainty in cell  
361 counting for failure cases where ground-truth is outside of some acceptable tolerance [51]. Our  
362 work is limited by the requirement of annotated datasets, in which the bias of the labelling can  
363 be introduced.

364 Similarly to the U-Net model, FCN's architecture consists of multiple convolutional  
365 layers to collect features from input data, and pooling layers minimize the spatial dimensions  
366 of the data to capture the most significant information. But given our results when comparing  
367 it with the U-Net model it was shown not to be the most optimum model.

368 In summary, the proposed approach, with the U-Net and ground truth masks, has  
369 demonstrated its robustness to be applied for automating prevalent operations across various  
370 life science research applications. Consequently, this strategy holds the potential to yield  
371 significant advantages in terms of expediting studies and mitigating operator bias, both within  
372 individual experiments and across diverse experimental contexts.

373

## 374 **Material and Methods**

375

376 This study proposed the implementation of the U-Net and FCN models for accurately  
377 segment platelets, in microscopy images. Platelets are dense and adherent cells, causing extra  
378 difficulties in the segmentation task [52,53]. In Fig 8 is depicted the overall procedure devised  
379 using U-Net for segmenting, counting, and calculating the area of the platelets, as this was the  
380 best performing system. All the procedures begun with the pre-processing of original  
381 microscope cell images, and preparation of the databases by augmentation of the original  
382 datasets. The preprocessing of the images was done primarily by adjusting image size of the  
383 images, followed by segmentation procedures. After detecting the platelets, the final counting  
384 is obtained as the number of connected pixels in the post-processed output. The study design  
385 decisions, such as the chosen threshold, were all aimed at reducing false negatives and  
386 promoting accurate segmentation, and images quality highly influences the training of the  
387 network, and the segmentation results possible to be achieved by it.

388

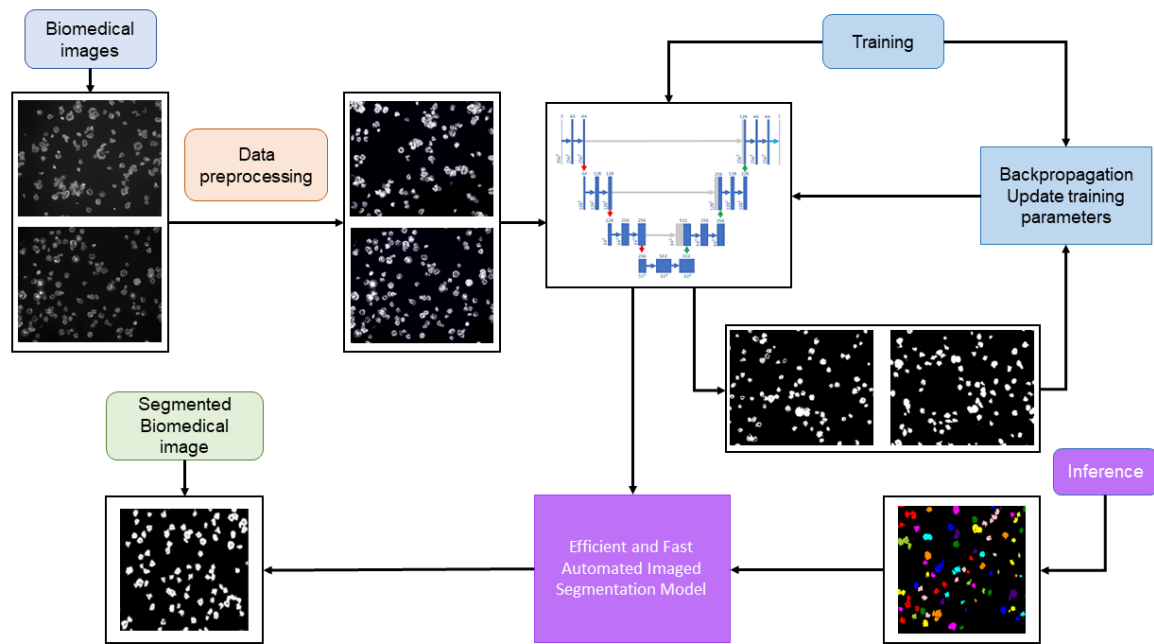

389

390 **Fig 8. Diagram of the methodology approach for segmenting platelets in biomedical**  
391 **images using the U-Net. Adapted from [54].**

392

## 393 **Dataset**

394

395 The suggested framework was assessed using a dataset gathered by the Centre for  
396 Biomedicine, Hull York Medical School, University of Hull, UK [55]. The original database  
397 includes 293 microscopy images that have been carefully classified by skilled experts. These  
398 datasets showed platelets clustered together with low-contrast cell borders. Cell size and  
399 appearance varied between datasets. The first dataset consisted in 293 microscopy cell images  
400 of human blood platelets after different treatments: with Zinc, Milrinone, and Mil-rinone +  
401 Zinc (in a total of 299, excluding five duplicates and one blank image). From the ethical  
402 perspective, no image annotation tool was used as the dataset does not contain an-notations or  
403 labelling. To increase the dataset size, were created two datasets with 1172 and 4688 cell  
404 images by data augmentation (splitting and rotating the original images). The original dataset

405 of 293 images was an 8-bit 3-channel jpeg of 2752x2208 pixels each (Fig 9). The dataset of  
406 1172 images were created by splitting 293 images into 4 quadrants resulting in 3-channel 1376  
407 x 1104 pixels each. Applying rotating methods, the dataset was increased from 1172 to 4688.  
408

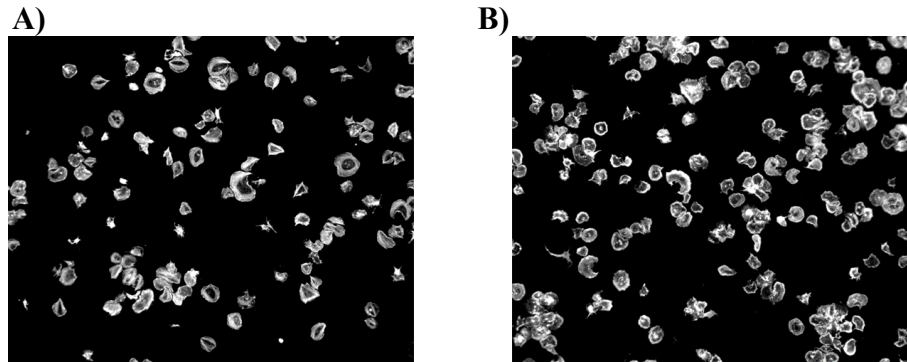

409  
410 **Fig 9. A and B). Two different samples of microscopy cell images from the original dataset.**

411 Images with 2752x2208 pixels.

412

## 413 **Data preprocessing**

414

415 Firstly, the dataset of 293 images was inspected and duplicates were removed to create  
416 this new cleaned database. Following, contrast was enhanced using Contrast Limited Adaptive  
417 Histogram Equalization (CLAHE) with clip limit of 3, which is a contrast enhancement  
418 technique that prevents over-amplification of noise. The data augmentation technique  
419 introduced new patterns into the training dataset, which made the training procedure more  
420 resistant to over-fitting, and was applied with randomized rigid geometric changes, scaling,  
421 and colour values (grey), where each training sample was rescaled, and then randomly spun  
422 before flipping it. A standard split of 80-20 train/test was used for all the final models, with the  
423 different tested datasets.

424 For both FCN and U-Net models masks were created for the segmentation but the  
425 procedure to create these masks was different. For the FCN model, masks were created as  
426 segmented images from Sobel operator at kernel value of 3, 5, 7 and 9 as appropriate. A larger  
427 kernel size increases sensitivity to broader edges but might reduce localization accuracy for  
428 finer details. The function in the sobel operator calculates the gradient magnitude by taking the  
429 square root of the sum of squared horizontal and vertical Sobel responses (sobel\_x and sobel\_y  
430 respectively) providing a combined measure of edge strength in both directions.

431 For visually inspecting the cell segmentation performed by the FCN Model and the  
432 model's performance, the ground truth masks were compared with the masks predicted by the  
433 model. For cell counting from the segmented images, multiple threshold values of 0.10, 0.15,  
434 0.25, and 0.5 were tested for minimum area or region of interest for creating bounding boxes.

435 For the U-Net model ground-truth masks were created by binarization of the images.  
436 This binarization happened from the threshold value which allowed all the cells to be binarized.  
437 As well here several binarization threshold values were tested, namely 0.05, 0.15, 0.25, 0.30  
438 and 0.50. 0.25 was considered the optimum threshold value for creating the ground truth masks  
439 as all the platelets would be binarized in a close area.

440 In the training phase, a supervised learning framework used the ground-truth la-belled  
441 images, as samples of desirable outputs that the model should learn to generate. In the case of  
442 image segmentation, such targets take the form of binary images (masks), with white (0) and  
443 black (1) pixels, representing the objects to segment and the background, respectively (Figure  
444 1). To the cleaned images was then applied a second threshold using automatic histogram  
445 shape-based algorithms. Region properties were calculated, and bounding boxes were drawn  
446 around regions with an area exceeding the specified second threshold applied of 0.5 to match  
447 the true mask and to eliminate the smaller particles or noise.

448

## 449 **Model architecture and training**

450

451 FCN architecture consists of an encoder-decoder structure. The encoder extracts  
452 features from the input images through convolutional and pooling layers, while the decoder up-  
453 samples these features to generate pixel-wise predictions. Skip connections were incorporated  
454 to preserve spatial information during upsampling.

455 The FCN architecture chosen comprised 2 layers of 4 convolutional blocks with 64 and  
456 128 filters in both the encoder and decoder section, with 2 max-pooling layers in the encoder,  
457 2 Up-sampling layers and 2 concatenation layers (one for each decoding block), and one final  
458 convolutional layer with a sigmoid activation function. The model was compiled using the  
459 Adam optimizer and binary cross-entropy loss function and the model was trained on the  
460 smaller dataset. A validation split of 20% was used to monitor the model's performance during  
461 training.

462 The model was evaluated on training and validation datasets with the complete iteration of 10  
463 epochs but abandoned due to less successful results than the U-Net model applied. The U-Net  
464 model used in our study [33], started with a defined input layer, accommodating image size of  
465 256x256 pixels with 3-color channel. For deeper feature extraction in encoder portion, a series  
466 of convolutional layers with 64, 128, and 256 filters of size 3x3 interspersed with rectified  
467 linear unit (ReLU) activations and max-pooling operations progressively reducing spatial  
468 dimensions, followed by a middle bottleneck layer of 512 filters to capture contextual  
469 information and a decoder segment with similar layers as encoder segment, which  
470 progressively up samples feature maps and concatenates them with feature maps from the  
471 corresponding encoder layers, enhancing localization precision.

472 Each of these convolutional blocks in the encoder, employed edge filling for each  
 473 convolutional layer to maintain the feature map and the ReLU function, and is expressed in  
 474 equation 1.

$$ReLU = \begin{cases} x & \text{if } x \geq 0 \\ 0 & \text{if } x < 0 \end{cases} \quad (1)$$

476  
 477 The final layer employed a sigmoid activation, followed by Adaptive Moment  
 478 Estimation (Adam) optimizer with learning rate of  $1E-4$ , and binary cross-entropy loss which  
 479 quantifies the dissimilarity between predicted and ground-truth segmentation maps.

480

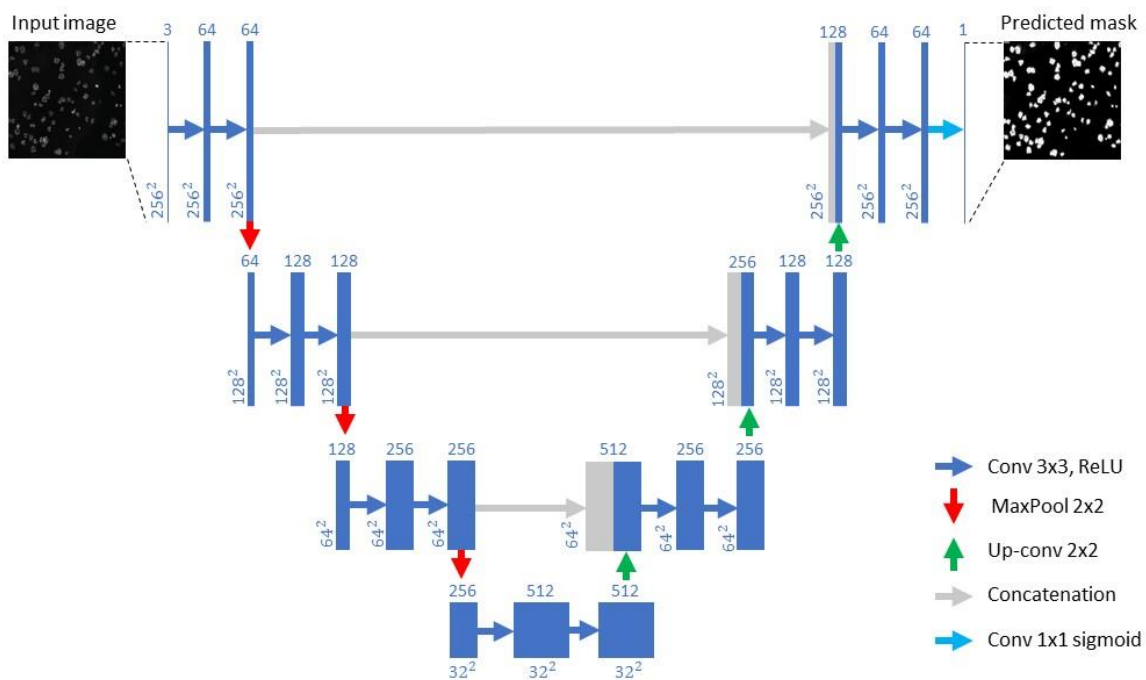

481

482

483 **Fig 10. U-Net applied architecture.** Adapted from [33].

484

485 In this scenario, image segmentation required unannotated data with ground-truth labels  
 486 resulting in an unsupervised or weakly supervised image segmentation approach, and the

487 construction of a loss function capable of assessing the quality of segments or clusters of pixels  
488 is the key difficulty. The model was compiled with binary cross-entropy as the loss function.

489 In our study the U-Net model (Fig 10) was trained and tested on 234 and 59 cell images  
490 and ground-truth masks, respectively.

491

## 492 **Metrics for model performance evaluation**

493

494 Intersection over Union (IoU) or the Jaccard Index (J), is a widely used metric in se-  
495 mantic segmentation, where A and B represent the true and predicted segmentation maps,  
496 respectively (Equation 1), and Dice (Equation 2).

497

$$IoU = J(A, B) = \frac{|A \cap B|}{|A \cup B|} \quad (2)$$

498

$$Dice\ coefficient = 2 * \frac{|A \cap B|}{|A| + |B|} \quad (3)$$

499

500 To calculate the overall detection of platelets (True Positive (TP)), it is assumed that  
501 the system properly detected more than 50% of the pixels. Precision (Equation 4), recall  
502 (Equation 5) and accuracy (Equation 6), were used for reporting the accuracy of image  
503 segmentation techniques. For pixel-wise comparison between the expected and the achieved  
504 were used the Mean Absolute Error (MAE) (Equation 7), Mean Percentage Error (MPE)  
505 (Equation 8) and Mean Average Precision (MAP) (Equation 9) were calculated.

506

$$Precision = \frac{TP}{TP + FP} \quad (4)$$

507

$$Recall = \frac{TP}{TP + FN} \quad (5)$$



508

$$Accuracy = \frac{TP + TN}{TP + TN + FP + FN} \quad (6)$$

509

$$MAE = (1/N) * \sum |y_i - x_i| \quad (7)$$

510

511 Where  $N$  is the number of samples, and  $|y_i - x_i|$  the error in absolute values.

512

$$MPE = \frac{1}{N} \sum_{i=1}^N (\hat{y}_i - y_i) \quad (8)$$

513

514 Where  $N$  is the number of samples,  $\hat{y}_i$  is the forecasting value, and  $y_i$  is actual load  
515 value.

516

$$MAP = \frac{1}{n} \sum_{k=1}^{k=n} AP_k \quad (9)$$

517

518 Where  $n$  is equal to the number of classes and  $AP_k$  the average precision of the class  $k$ .

519

## 520 **Software and hardware**

521

522 The experiments were conducted on a system running Windows 11 Home 23H2. Data  
523 preprocessing was performed using Python 3.11.3 with scikit-learn (1.2.2) library. The deep  
524 learning models were implemented with TensorFlow (v2.15) and Keras (v2.15) libraries. Code  
525 development was carried out using Jupyter Notebook (v6.5.4).

526 Experiments were conducted on a system equipped with an Intel Core i5-12400 CPU  
527 (6 cores, 12 threads) clocked at 2.50 GHz. Deep learning experiments were accelerated using

528 Intel® UHD Graphics 730 memory. The system was equipped with 24 GB of DDR4 RAM.

529 Data storage and retrieval were facilitated by a 500 GB NVMe SSD.

530

## 531 **References**

532 1. Nawabi AK, Jinfang S, Abbasi R, Iqbal MS, Heyat MB Bin, Akhtar F, et al. Segmentation

533 of Drug-Treated Cell Image and Mitochondrial-Oxidative Stress Using Deep

534 Convolutional Neural Network. *Oxid Med Cell Longev*. 2022;2022.

535 doi:10.1155/2022/5641727

536 2. Shrestha P, Kuang N, Yu J. Efficient end-to-end learning for cell segmentation with

537 machine generated weak annotations. *Commun Biol*. 2023;6. doi:10.1038/s42003-023-

538 04608-5

539 3. Angermueller C, Pärnamaa T, Parts L, Stegle O. Deep learning for computational biology.

540 *Mol Syst Biol*. 2016;12: 878. doi:10.15252/msb.20156651

541 4. Zeiler MD, Fergus R. Visualizing and Understanding Convolutional Networks. In: Fleet D,

542 Pajdla T, Schiele B, Tuytelaars T, editors. *Computer Vision – ECCV 2014* ECCV 2014

543 *Lecture Notes in Computer Science*. Cham: Springer; 2014. pp. 818–833.

544 doi:10.1007/978-3-319-10590-1\_53

545 5. Xu J, Zhou D, Deng D, Li J, Chen C, Liao X, et al. Deep Learning in Cell Image Analysis.

546 *Intelligent Computing*. 2022;2022. doi:10.34133/2022/9861263

547 6. Kurnianingsih, Allehaibi KHS, Nugroho LE, Widyawan, Lazuardi L, Prabuwo AS, et al.

548 Segmentation and classification of cervical cells using deep learning. *IEEE Access*.

549 2019;7: 116925–116941. doi:10.1109/ACCESS.2019.2936017

550 7. Garcia-Garcia A, Orts-Escolano S, Oprea S, Villena-Martinez V, Garcia-Rodriguez J. A

551 Review on Deep Learning Techniques Applied to Semantic Segmentation.

- 552 arXiv:1704.06857 [Preprint]. 2017. Available from:  
553 <https://doi.org/10.48550/arXiv.1704.06857>
- 554 8. Ronneberger O, Fischer P, Brox T. U-Net: Convolutional Networks for Biomedical Image  
555 Segmentation. In: Navab N, Hornegger J, Wells W, Frangi A, editors. Medical Image  
556 Computing and Computer-Assisted Intervention – MICCAI 2015 MICCAI 2015 Lecture  
557 Notes in Computer Science. Cham: Springer; 2015. pp. 234–241. doi:10.1007/978-3-319-  
558 24574-4\_28
- 559 9. Simonyan K, Zisserman A. Very Deep Convolutional Networks for Large-Scale Image  
560 Recognition. arXiv:1409.1556 [Preprint]. 2014. Available from:  
561 <https://doi.org/10.48550/arXiv.1409.1556>
- 562 10. He K, Zhang X, Ren S, Sun J. Deep Residual Learning for Image Recognition. 2016  
563 IEEE Conference on Computer Vision and Pattern Recognition (CVPR). Las Vegas, NV,  
564 USA: IEEE; 2016. pp. 770–778. doi:10.1109/CVPR.2016.90
- 565 11. Chen L-C, Papandreou G, Kokkinos I, Murphy K, Yuille AL. DeepLab: Semantic Image  
566 Segmentation with Deep Convolutional Nets, Atrous Convolution, and Fully Connected  
567 CRFs. IEEE Trans Pattern Anal Mach Intell. 2018;40: 834–848.  
568 doi:10.1109/TPAMI.2017.2699184
- 569 12. Goodfellow IJ, Pouget-Abadie J, Mirza M, Xu B, Warde-Farley D, Ozair S, et al.  
570 Generative Adversarial Networks. arXiv:1406.2661 [Preprint]. 2014. Available from:  
571 <https://doi.org/10.48550/arXiv.1406.2661>
- 572 13. Liao Y-H, Kar A, Fidler S. Towards Good Practices for Efficiently Annotating Large-  
573 Scale Image Classification Datasets. 2021 IEEE/CVF Conference on Computer Vision and  
574 Pattern Recognition (CVPR). Nashville, TN, USA: IEEE; 2021. pp. 4348–4357.  
575 doi:10.1109/CVPR46437.2021.00433

- 576 14. Edlund C, Jackson TR, Khalid N, Bevan N, Dale T, Dengel A, et al. LIVECell—A large-  
577 scale dataset for label-free live cell segmentation. *Nat Methods*. 2021;18: 1038–1045.  
578 doi:10.1038/s41592-021-01249-6
- 579 15. Moen E, Bannon D, Kudo T, Graf W, Covert M, Van Valen D. Deep learning for cellular  
580 image analysis. *Nature Methods*. 2019. pp. 1233–1246. doi:10.1038/s41592-019-0403-1
- 581 16. Chai B, Efstathiou C, Yue H, Draviam VM. Opportunities and challenges for deep  
582 learning in cell dynamics research. *Trends Cell Biol*. 2023. doi:10.1016/j.tcb.2023.10.010
- 583 17. Vorontsov E, Kadoury S. Label Noise in Segmentation Networks: Mitigation Must Deal  
584 with Bias. In: Engelhardt S, Oksuz I, Zhu D, Yuan Y, Mukhopadhyay A, Heller N, et al.,  
585 editors. *Deep Generative Models, and Data Augmentation, Labelling, and Imperfections*  
586 *DGM4MICCAI DALI 2021 2021 Lecture Notes in Computer Science*. Cham: Springer;  
587 2021. pp. 251–258. doi:10.1007/978-3-030-88210-5\_25
- 588 18. Bernhardt M, Castro DC, Tanno R, Schwaighofer A, Tezcan KC, Monteiro M, et al.  
589 Active label cleaning for improved dataset quality under resource constraints. *Nat*  
590 *Commun*. 2022;13. doi:10.1038/s41467-022-28818-3
- 591 19. Alzubaidi L, Zhang J, Humaidi AJ, Al-Dujaili A, Duan Y, Al-Shamma O, et al. Review of  
592 deep learning: concepts, CNN architectures, challenges, applications, future directions. *J*  
593 *Big Data*. 2021;8: 53. doi:10.1186/s40537-021-00444-8
- 594 20. Souly N, Spampinato C, Shah M. Semi Supervised Semantic Segmentation Using  
595 Generative Adversarial Network. *Proceedings of the IEEE International Conference on*  
596 *Computer Vision*. 2017. doi:10.1109/ICCV.2017.606
- 597 21. Shorten C, Khoshgoftaar TM. A survey on Image Data Augmentation for Deep Learning.  
598 *J Big Data*. 2019;6: 60. doi:10.1186/s40537-019-0197-0

- 599 22. Farokhmanesh F, Sadeghi MT. Deep Neural Networks Regularization Using a  
600 Combination of Sparsity Inducing Feature Selection Methods. *Neural Process Lett.*  
601 2021;53: 701–720. doi:10.1007/s11063-020-10389-3
- 602 23. Moradi R, Berangi R, Minaei B. A survey of regularization strategies for deep models.  
603 *Artif Intell Rev.* 2020;53: 3947–3986. doi:10.1007/s10462-019-09784-7
- 604 24. Long J, Shelhamer E, Darrell T. Fully convolutional networks for semantic segmentation.  
605 *Proceedings of the IEEE Computer Society Conference on Computer Vision and Pattern*  
606 *Recognition.* 2015. doi:10.1109/CVPR.2015.7298965
- 607 25. Rizwan I Haque I, Neubert J. Deep learning approaches to biomedical image  
608 segmentation. *Inform Med Unlocked.* 2020;18: 100297. doi:10.1016/j.imu.2020.100297
- 609 26. Krizhevsky A, Sutskever I, Hinton GE. ImageNet classification with deep convolutional  
610 neural networks. *Commun ACM.* 2017;60: 84–90. doi:10.1145/3065386
- 611 27. Sirinukunwattana K, Raza SEA, Tsang YW, Snead DRJ, Cree IA, Rajpoot NM. Locality  
612 Sensitive Deep Learning for Detection and Classification of Nuclei in Routine Colon  
613 Cancer Histology Images. *IEEE Trans Med Imaging.* 2016;35: 1196–1206.  
614 doi:10.1109/TMI.2016.2525803
- 615 28. Payer C, Štern D, Feiner M, Bischof H, Urschler M. Segmenting and tracking cell  
616 instances with cosine embeddings and recurrent hourglass networks. *Med Image Anal.*  
617 2019;57: 106–119. doi:10.1016/j.media.2019.06.015
- 618 29. Zhou Z, Wang F, Xi W, Chen H, Gao P, He C. Joint Multi-frame Detection and  
619 Segmentation for Multi-cell Tracking. arXiv:1906.10886 [Preprint]. 2019. Available from:  
620 <https://doi.org/10.48550/arXiv.1906.10886>
- 621 30. Durkee MS, Abraham R, Clark MR, Giger ML. Artificial Intelligence and Cellular  
622 Segmentation in Tissue Microscopy Images. *American Journal of Pathology.* 2021;191:  
623 1693–1701. doi:10.1016/j.ajpath.2021.05.022

- 624 31. Kempster C, Butler G, Kuznecova E, Taylor KA, Kriek N, Little G, et al. Fully automated  
625 platelet differential interference contrast image analysis via deep learning. *Sci Rep.*  
626 2022;12: 4614. doi:10.1038/s41598-022-08613-2
- 627 32. Hao F, Xu D, Chen D, Hu Y, Zhu C. Sobel operator enhancement based on eight-  
628 directional convolution and entropy. *International Journal of Information Technology.*  
629 2021;13: 1823–1828. doi:10.1007/s41870-021-00770-3
- 630 33. Silburt A, Ali-Dib M, Zhu C, Jackson A, Valencia D, Kissin Y, et al. Lunar crater  
631 identification via deep learning. *Icarus.* 2019;317: 27–38.  
632 doi:10.1016/j.icarus.2018.06.022
- 633 34. Yao W, Bai J, Liao W, Chen Y, Liu M, Xie Y. From CNN to Transformer: A Review of  
634 Medical Image Segmentation Models. *Journal of Imaging Informatics in Medicine.*  
635 2024;37: 1529–1547. doi:10.1007/s10278-024-00981-7
- 636 35. Ma J, He Y, Li F, Han L, You C, Wang B. Segment anything in medical images. *Nat*  
637 *Commun.* 2024;15: 654. doi:10.1038/s41467-024-44824-z
- 638 36. Wilm F, Ammeling J, Öttl M, Fick RHJ, Aubreville M, Breininger K. Rethinking U-net  
639 Skip Connections for Biomedical Image Segmentation. arXiv:2402.08276 [Preprint].  
640 2024. Available from: <https://doi.org/10.48550/arXiv.2402.08276>
- 641 37. Ibtehaz N, Rahman MS. MultiResUNet: Rethinking the U-Net architecture for  
642 multimodal biomedical image segmentation. *Neural Networks.* 2020;121: 74–87.  
643 doi:10.1016/j.neunet.2019.08.025
- 644 38. Mazurowski MA, Dong H, Gu H, Yang J, Konz N, Zhang Y. Segment anything model for  
645 medical image analysis: An experimental study. *Med Image Anal.* 2023;89: 102918.  
646 doi:10.1016/j.media.2023.102918

- 647 39. Athanasiou G, Arcos JL, Cerquides J. Enhancing Medical Image Segmentation: Ground  
648 Truth Optimization through Evaluating Uncertainty in Expert Annotations. *Mathematics*.  
649 2023;11: 3771. doi:10.3390/math11173771
- 650 40. Ghnemat R, Almodawar AR, Al Saraireh J. Scalable model for segmenting Cells' Nuclei  
651 using the U-NET architecture. *Multimed Tools Appl*. 2024;83: 63655–63678.  
652 doi:10.1007/s11042-023-18033-7
- 653 41. Siddique N, Paheding S, Elkin CP, Devabhaktuni V. U-Net and Its Variants for Medical  
654 Image Segmentation: A Review of Theory and Applications. *IEEE Access*. 2021;9: 82031–  
655 82057. doi:10.1109/ACCESS.2021.3086020
- 656 42. Ning L, Guan H, Shen X. Adaptive Deep Reuse: Accelerating CNN Training on the Fly.  
657 *Proceedings - International Conference on Data Engineering*. 2019.  
658 doi:10.1109/ICDE.2019.00138
- 659 43. Kataras TJ, Jang TJ, Koury J, Singh H, Fok D, Kaul M. ACCT is a fast and accessible  
660 automatic cell counting tool using machine learning for 2D image segmentation. *Sci Rep*.  
661 2023;13: 8213. doi:10.1038/s41598-023-34943-w
- 662 44. Kuo TC, Cheng TW, Lin CK, Chang MC, Cheng KY, Cheng YC. Using DeepLab v3 + -  
663 based semantic segmentation to evaluate platelet activation. *Med Biol Eng Comput*.  
664 2022;60: 1775–1785. doi:10.1007/s11517-022-02575-3
- 665 45. Morelli R, Clissa L, Amici R, Cerri M, Hitrec T, Luppi M, et al. Automating cell counting  
666 in fluorescent microscopy through deep learning with c-ResUnet. *Sci Rep*. 2021;11:  
667 22920. doi:10.1038/s41598-021-01929-5
- 668 46. De La Salle BJ, McTaggart PN, Briggs C, Harrison P, Doré CJ, Longair I, et al. The  
669 accuracy of platelet counting in thrombocytopenic blood samples distributed by the UK  
670 National External Quality Assessment Scheme for General Haematology. *Am J Clin*  
671 *Pathol*. 2012;137: 65–74. doi:10.1309/AJCP86JMBFUCFCXA

- 672 47. Chen YM, Tsai JT, Ho WH. Automatic identifying and counting blood cells in smear  
673 images by using single shot detector and Taguchi method. BMC Bioinformatics. 2021;22:  
674 635. doi:10.1186/s12859-022-05074-2
- 675 48. Oñoro-Rubio D, López-Sastre RJ. Towards Perspective-Free Object Counting with Deep  
676 Learning. In: Leibe B, Matas J, Sebe N, Welling M, editors. Computer Vision – ECCV  
677 2016 ECCV 2016 Lecture Notes in Computer Science. Cham: Springer; 2016. pp. 615–  
678 629. doi:10.1007/978-3-319-46478-7\_38
- 679 49. Wu J, Liu W, Li C, Jiang T, Shariful IM, Yao Y, et al. A state-of-the-art survey of U-Net in  
680 microscopic image analysis: from simple usage to structure mortification. Neural Comput  
681 Appl. 2024;36: 3317–3346. doi:10.1007/s00521-023-09284-4
- 682 50. Bhandary M, Reyes JP, Ertay E, Panda A. Double U-Net for Super-Resolution and  
683 Segmentation of Live Cell Images. arXiv:2212.02028 [Preprint]. 2022. Available from:  
684 <https://doi.org/10.48550/arXiv.2212.02028>
- 685 51. Abdar M, Pourpanah F, Hussain S, Rezazadegan D, Liu L, Ghavamzadeh M, et al. A  
686 review of uncertainty quantification in deep learning: Techniques, applications and  
687 challenges. Information Fusion. 2021;76: 243–297. doi:10.1016/j.inffus.2021.05.008
- 688 52. Ghoshal K, Bhattacharyya M. Overview of Platelet Physiology: Its Hemostatic and  
689 Nonhemostatic Role in Disease Pathogenesis. The Scientific World Journal. 2014;2014.  
690 doi:10.1155/2014/781857
- 691 53. Wang A, Zhang Q, Han Y, Megason S, Hormoz S, Mosaliganti KR, et al. A novel deep  
692 learning-based 3D cell segmentation framework for future image-based disease detection.  
693 Sci Rep. 2022;12: 342. doi:10.1038/s41598-021-04048-3
- 694 54. Qin J, Liu T, Wang Z, Liu L, Fang H. GCT-UNET: U-Net Image Segmentation Model for  
695 a Small Sample of Adherent Bone Marrow Cells Based on a Gated Channel Transform  
696 Module. Electronics (Basel). 2022;11: 3755. doi:10.3390/electronics11223755



697 55. Coupland CA, Naylor-Adamson L, Booth Z, Price TW, Gil HM, Firth G, et al. Platelet  
698 zinc status regulates prostaglandin-induced signaling, altering thrombus formation. Journal  
699 of Thrombosis and Haemostasis. 2023;21: 2545–2558. doi:10.1016/j.jtha.2023.05.008  
700  
701  
702  
703
